# Supplementary material for: QuantTB – a method to classify mixed Mycobacterium tuberculosis infections within whole genome sequencing data
Source: PubMed Central journal article supplement (PMC6986090; doi:10.1186/s12864-020-6486-3), 2020-01-28

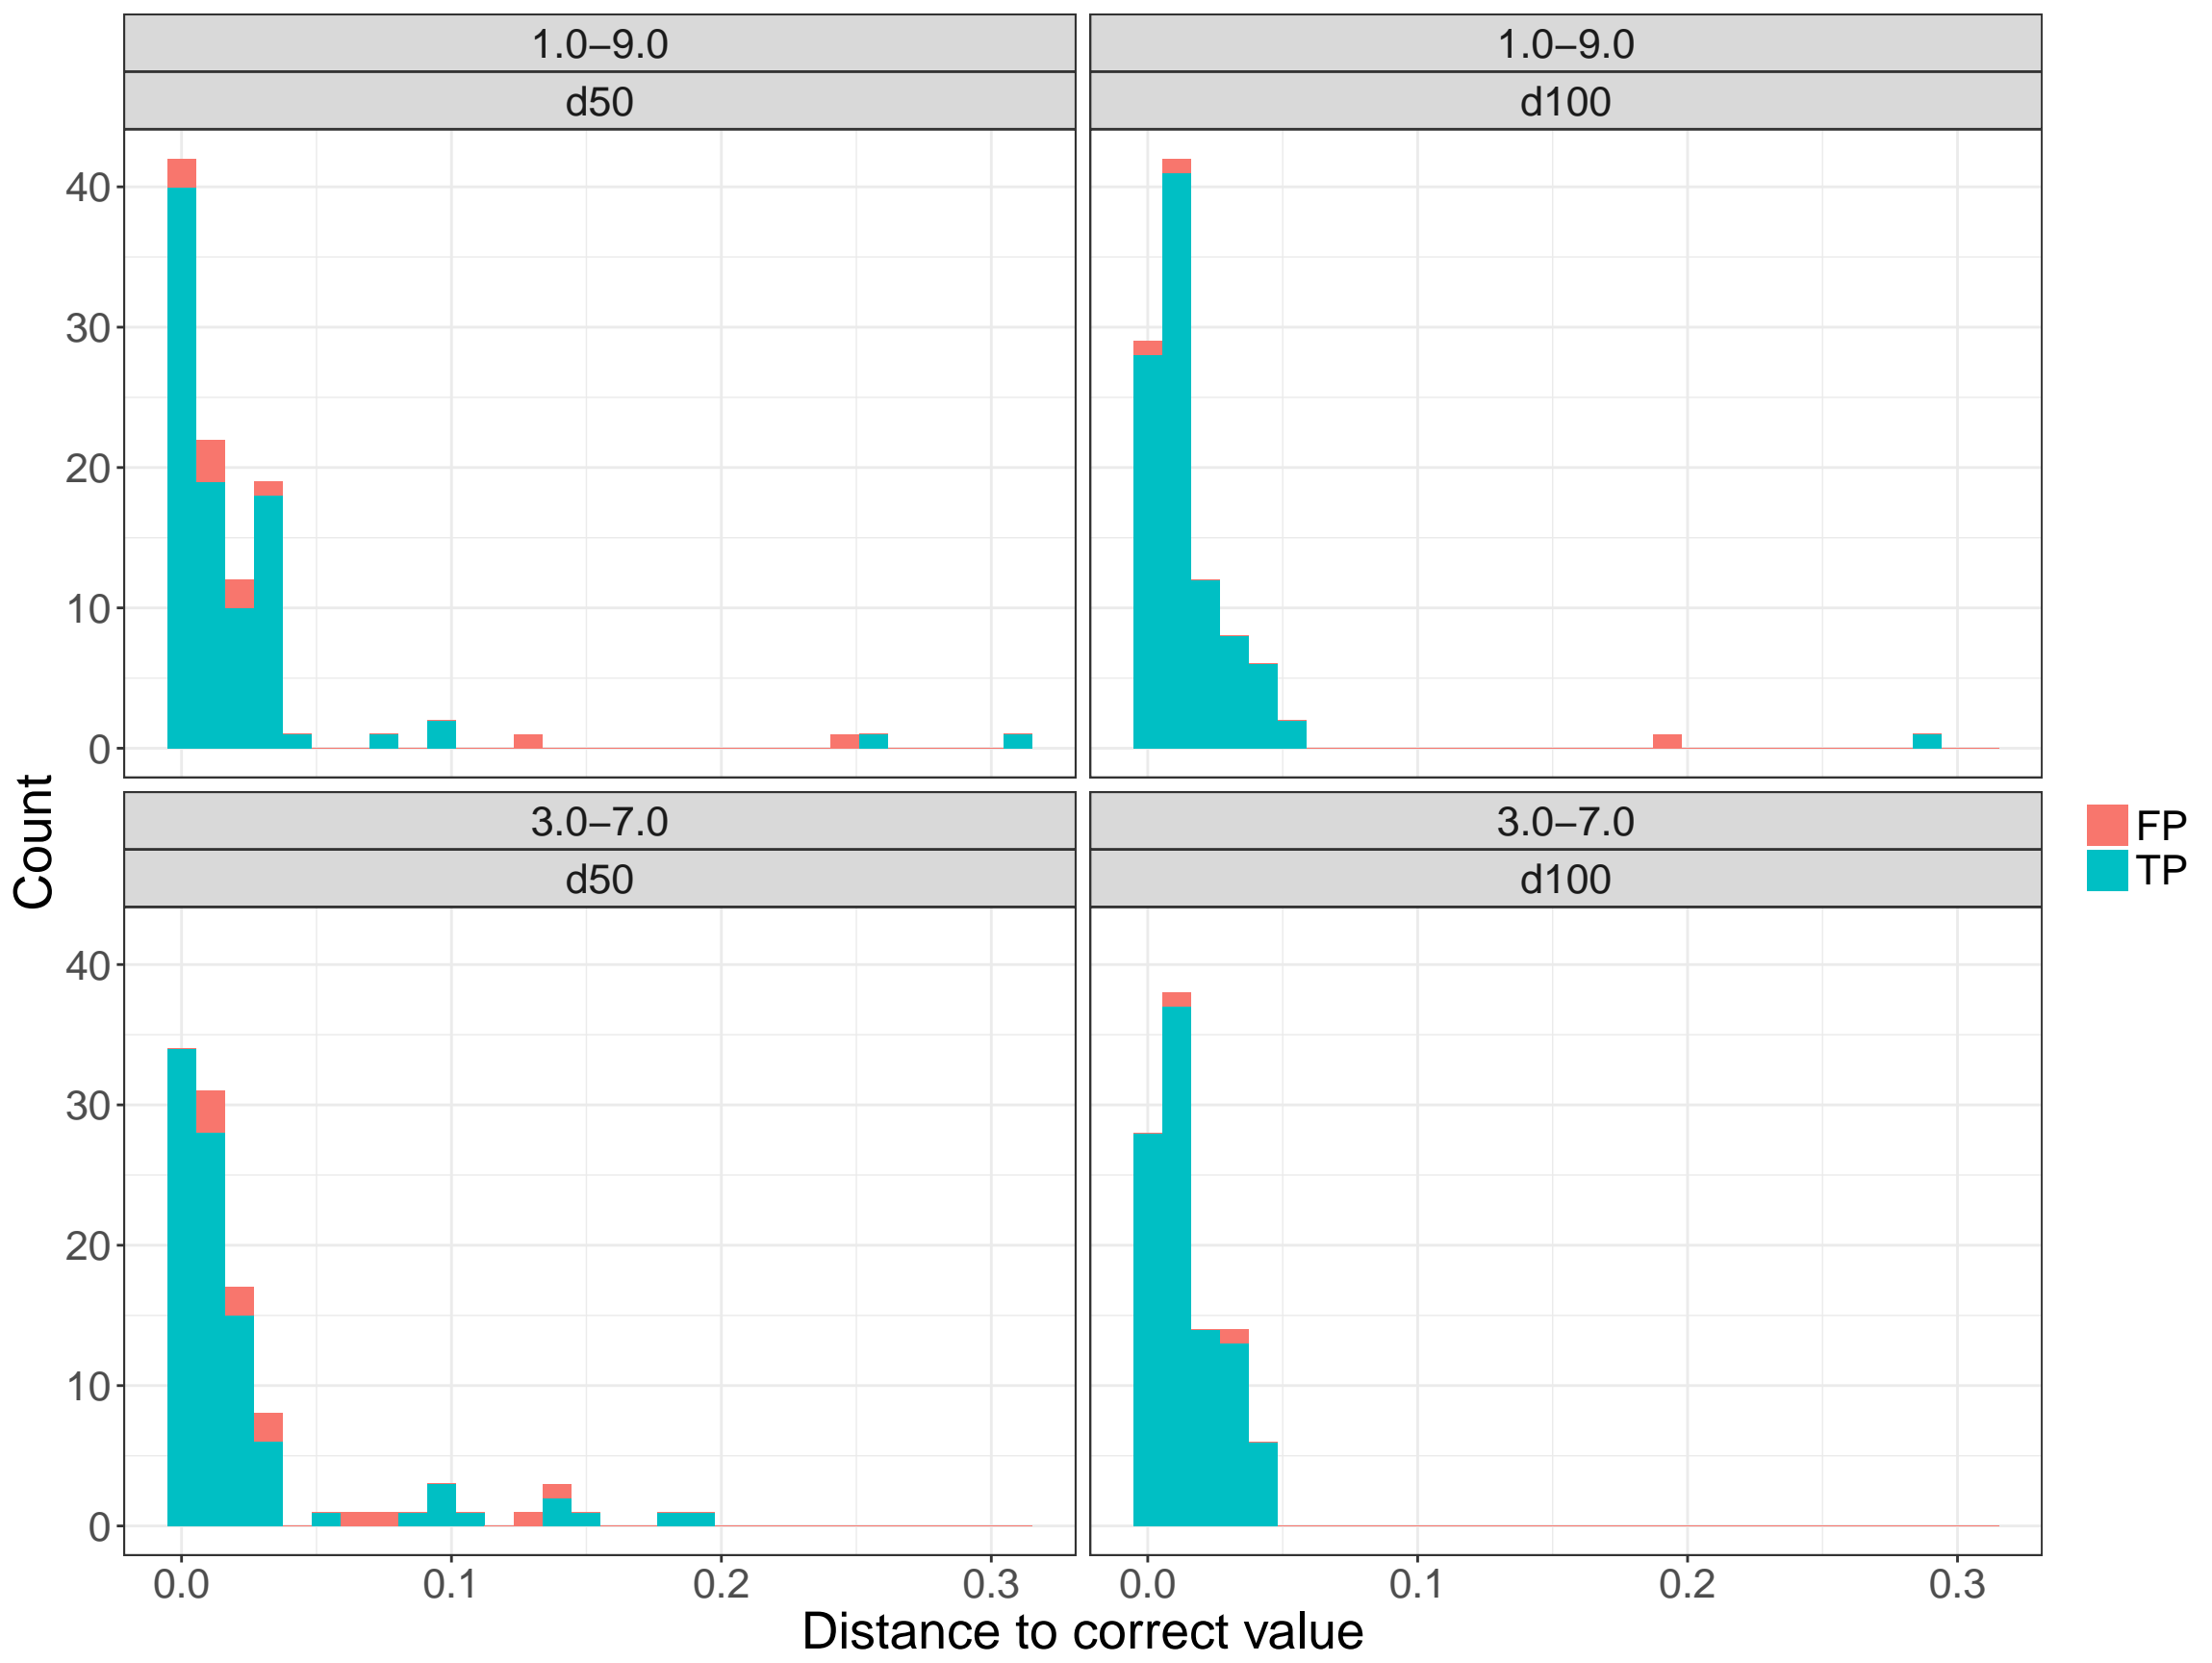

Supplement: 12864_2020_6486_MOESM2_ESM.pdf [file 12864_2020_6486_MOESM2_ESM.pdf]
